# Supplementary material for: Plasma EGFR mutation abundance affects clinical response to first-line EGFR-TKIs in patients with advanced non-small cell lung cancer
Source: PubMed Central journal article supplement — Ann Transl Med. 2021 Apr;9(8):635. doi: 10.21037/atm-20-7155 (PMC8106032; doi:10.21037/atm-20-7155), 2021-04
Supplement: atm-09-08-635-supplementary.pdf [file atm-09-08-635-supplementary.pdf]

Table S1 Mutation type and abundance in tissue or plasma for EGFR-positive patients

| Pt No. | Treatment | Tissue ARMS | Plasma cSMART | Abundance | Comutated genes   |
|--------|-----------|-------------|---------------|-----------|-------------------|
| 1      | TKI       | 19Del       | 19Del         | 1.66%     |                   |
| 2      | TKI       | L858R       | L858R         | 1.32%     |                   |
| 3      | TKI       | 19Del       | 19Del         | 1.01%     |                   |
| 4      | TKI       | L861Q       | L861Q         | 2.62%     | KRAS, PIK3CA      |
| 5      | TKI       | negative    | G719A         | 0.03%     | TP53              |
| 6      | TKI       | 19Del       | 19Del         | 0.19%     | TP53, ALK, PIK3CA |
| 7      | TKI       | L861Q       | L861Q         | 0.07%     | TP53              |
| 8      | TKI       | 19Del       | 19Del         | 34.52%    | TP53              |
| 9      | TKI       | S768I       | G719C         | 34.88%    | TP53              |
|        |           |             | S768I         | 31.45%    |                   |
| 10     | TKI       | negative    | L861Q         | 0.03%     | TP53              |
| 11     | TKI       | L858R       | L858R         | 0.97%     | TP53              |
| 12     | TKI       | L858R       | L858R         | 3.33%     |                   |
| 13     | TKI       | 19Del       | 19Del         | 0.02%     |                   |
| 14     | TKI       | 19Del       | 19Del         | 5.74%     | TP53              |
| 15     | TKI       | 19Del       | 19Del         | 0.09%     |                   |
| 16     | TKI       | G719X       | G719A         | 4.14%     | TP53              |
| 17     | TKI       | L858R       | L858R         | 10.48%    | TP53              |
| 18     | TKI       | 19Del       | 19Del         | 4.43%     |                   |
| 19     | TKI       | L858R       | L858R         | 0.10%     |                   |
| 20     | TKI       | negative    | G719C         | 0.59%     | TP53              |
| 21     | TKI       | 19Del       | 19Del         | 0.03%     |                   |
| 22     | TKI       | negative    | G719C         | 0.04%     | ERBB2, TP53       |
| 23     | TKI       | negative    | G719C         | 0.02%     | TP53              |
| 24     | TKI       | L858R       | L858R         | 1.23%     |                   |
| 25     | TKI       | undetected  | 19Del         | 4.45%     | TP53, ALK, KRAS   |
| 26     | TKI       | 19Del       | 19Del         | 2.00%     | TP53              |
| 27     | TKI       | negative    | G719S         | 0.03%     | KRAS, PIK3CA, ALK |
| 28     | TKI       | S768I       | S768I         | 1.94%     | TP53              |
|        |           | G719X       | G719A         | 1.86%     |                   |
| 29     | TKI       | 19Del       | 19Del         | 1.08%     |                   |
| 30     | TKI       | L858R       | L858R         | 0.88%     |                   |
| 31     | TKI       | 19Del       | 19Del         | 0.61%     |                   |
| 32     | TKI       | negative    | G719A         | 0.04%     | TP53              |
| 33     | TKI       | L858R       | L858R         | 3.44%     |                   |
| 34     | TKI       | 19Del       | 19Del         | 0.59%     |                   |
| 35     | TKI       | L858R       | L858R         | 0.80%     |                   |
| 36     | TKI       | 19Del       | 19Del         | 0.22%     | TP53              |
|        |           |             | E20ins        | 0.06%     |                   |
| 37     | TKI       | L858R       | L858R         | 0.14%     | TP53              |
| 38     | TKI       | negative    | G719A         | 3.47%     |                   |
| 39     | TKI       | L858R       | L858R         | 3.12%     | KRAS              |
| 40     | TKI       | 19Del       | 19Del         | 1.57%     |                   |
| 41     | TKI       | negative    | 19Del         | 0.88%     | TP53, KRAS        |
| 42     | TKI       | L858R       | L858R         | 47.76%    |                   |
| 43     | TKI       | S768I       | G719C         | 0.05%     |                   |
| 44     | TKI       | L858R+S768I | L858R         | 1.19%     | TP53              |
|        |           |             | S768I         | 1.08%     |                   |
| 45     | TKI       | S768I       | S768I         | 3.49%     |                   |
|        |           |             | G719D         | 3.02%     |                   |
| 46     | TKI       | negative    | L858R         | 3.03%     | TP53              |
| 47     | TKI       | 19Del       | 19Del         | 1.19%     | PIK3CA            |
| 48     | TKI       | L858R       | L858R         | 13.68%    | TP53              |
| 49     | TKI       | 19Del       | G719A         | 0.05%     | KRAS, MET         |
| 50     | TKI       | L858R       | L858R         | 15.95%    |                   |
| 51     | TKI       | L858R       | L858R         | 0.07%     | ALK               |
| 52     | TKI       | L858R       | L858R         | 3.17%     | TP53              |
| 53     | TKI       | 19Del       | 19Del         | 0.19%     |                   |
| 54     | TKI       | G719A+S768I | G719A         | 22.34%    | TP53, PIK3CA      |
|        |           |             | S768I         | 19.99%    |                   |
| 55     | TKI       | 19Del       | negative      |           |                   |
| 56     | TKI       | 19Del       | 19Del         | 0.05%     | TP53, ALK, BRAF   |
|        |           |             | T790M         | 0.04%     |                   |
| 57     | TKI       | L858R       | L858R         | 0.12%     | TP53              |
|        |           |             | T790M         | 0.07%     |                   |
| 58     | TKI       | L858R       | T790M         | 0.06%     | PIK3CA            |
| 59     | TKI       | 19Del+T790M | 19Del         | 57.02%    |                   |
|        |           |             | T790M         | 15.00%    |                   |
| 60     | nonTKI    | negative    | T790M         | 0.02%     | TP53, ALK         |
| 61     | TKI       | L858R       | negative      |           | TP53              |
| 62     | TKI       | L858R       | negative      |           |                   |
| 63     | nonTKI    | 19Del       | negative      |           |                   |
| 64     | nonTKI    | 19Del       | 19Del         | 0.17%     | TP53              |
| 65     | nonTKI    | negative    | G719A         | 0.03%     |                   |
| 66     | nonTKI    | L858R       | L858R         | 8.67%     | TP53              |
|        |           |             | G719C         | 0.03%     |                   |
| 67     | nonTKI    | negative    | E20ins        | 0.05%     | TP53, KRAS        |
| 68     | nonTKI    | 19Del       | 19Del         | 0.16%     | ALK               |
| 69     | nonTKI    | negative    | E20ins        | 0.40%     | TP53, ALK         |
| 70     | nonTKI    | negative    | T790M         | 0.02%     | TP53, PIK3CA      |
| 71     | nonTKI    | negative    | E20ins        | 0.06%     | TP53              |
| 72     | nonTKI    | E20ins      | negative      |           |                   |
| 73     | nonTKI    | L858R       | negative      |           | KRAS              |

**Table S2** Characteristics and response of patients with acquired T790M mutation

| Pt No. | Gender | Age | ECOG PS | Response | PFS | Sensitizing mutation |               | T790M | Period (days) |
|--------|--------|-----|---------|----------|-----|----------------------|---------------|-------|---------------|
|        |        |     |         |          |     | Type                 | Abundance (%) |       |               |
| 1      | M      | 65  | 1       | SD       | 16  | 19Del                | 0.78          | 0.29  | 260           |
| 2      | F      | 71  | 2       | PR       | 7   | 19Del                | 0.51          | 0.16  | 45            |
| 3      | F      | 55  | 1       | PR       | 8   | 19Del                | 0.53          | 0.26  | 244           |
| 4      | F      | 68  | 0       | PR       | 10  | L858R                | 0.09          | 0.12  | 274           |
| 5      | F      | 57  | 1       | SD       | 12  | L858R                | 27.12         | 10.2  | 276           |
| 6      | M      | 68  | 1       | SD       | 8   | L858R                | 17.17         | 5.97  | 381           |
| 7      | F      | 61  | 1       | PR       | 17  | 19Del                | 0.17          | 0.39  | 416           |
| 8      | F      | 75  | 2       | SD       | 13  | L858R                | 1.66          | 0.86  | 176           |
| 9      | M      | 55  | 1       | SD       | 8   | L858R                | 0.97          | 0.15  | 233           |
| 10     | M      | 54  | 4       | SD       | 3.5 | G719A                | 32.92         | 0.01  | 69            |
|        |        |     |         |          |     | S768I                | 30.65         |       |               |
| 11     | F      | 52  | 0       | PR       | 13  | 19Del                | 1.05          | 0.69  | 391           |

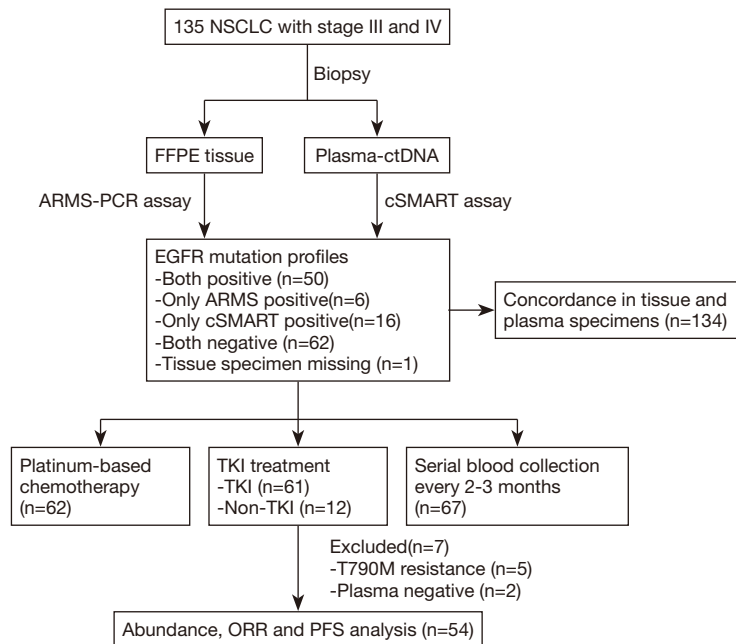

**Figure S1** Patient enrollment and study overview.
